# Supplementary material
Source: PubMed Central journal article supplement (PMC4311191)
Supplement: supp_mdu212_mdu212supp.pdf [file supp_mdu212_mdu212supp.pdf]

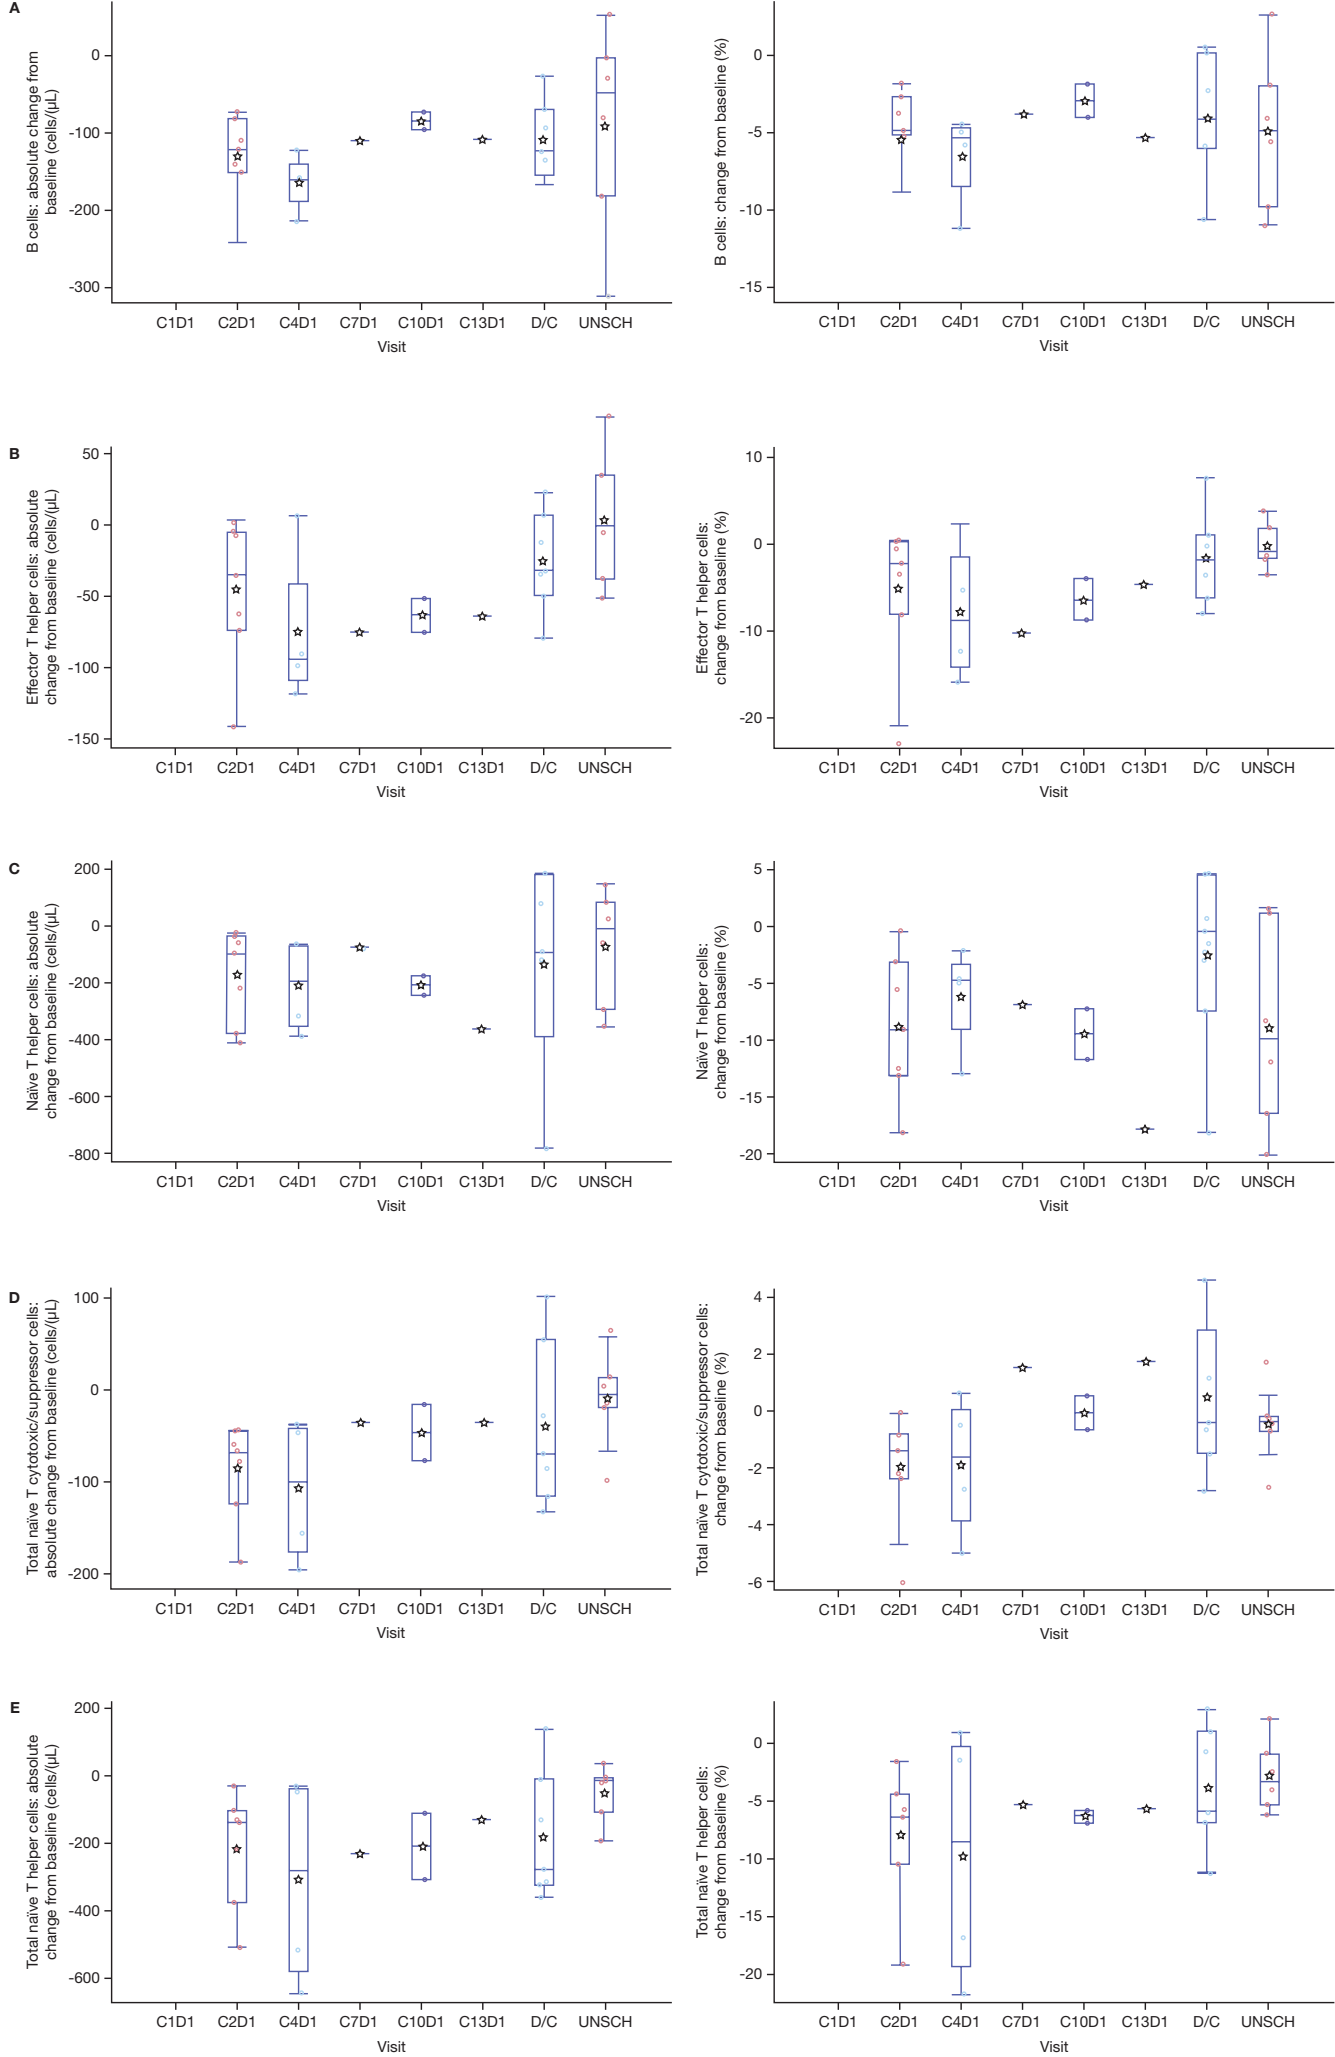

**Supplementary Figure S1.** Absolute count and percentage change from baseline in CD45+ T cells, B cells, and NK cells: BE population (N = 16). (A) B cells; (B) effector T helper cells; (C) naive T helper cells; (D) total naive T cytotoxic/suppressor cells; and (E) total naive T helper cells. C, cycle; D, day; D/C, discontinuation; UNSCH, unscheduled.
